# Supplementary material for: Simultaneous inhibition of heat shock proteins and autophagy enhances radiofrequency ablation of hepatocellular carcinoma
Source: Royal Society of Chemistry journal article supplement (doi:10.1039/d4bm01190b), 2024-01-01
Supplement: d4bm01190b1.pdf [file d4bm01190b1.pdf]

## Supplementary material

### **Simultaneous inhibition of heat shock proteins and autophagy enhances radiofrequency ablation of hepatocellular carcinoma**

Jinchao Zhao,<sup>a</sup> Lei Lei,<sup>a</sup> Wenbin Dai,<sup>b</sup> Angfeng Jiang,<sup>a</sup> Qiao Jin,<sup>\*,b</sup> and Zhe Tang,<sup>\*,a,c</sup>

<sup>a</sup> Department of General Surgery, The Fourth Affiliated Hospital, International Institutes of Medicine, Zhejiang University School of Medicine, Yiwu, 322000, China.

<sup>b</sup> MOE Key Laboratory of Macromolecular Synthesis and Functionalization, Department of Polymer Science and Engineering, Zhejiang University, Hangzhou, 310058, China.

<sup>c</sup> Department of Surgery, The Second Affiliated Hospital, Zhejiang University School of Medicine, Hangzhou, 310009, China.

Corresponding author:

\*E-mail: [jinqiao@zju.edu.cn](mailto:jinqiao@zju.edu.cn) (Q. J.), [8xi@zju.edu.cn](mailto:8xi@zju.edu.cn) (Z.T.)

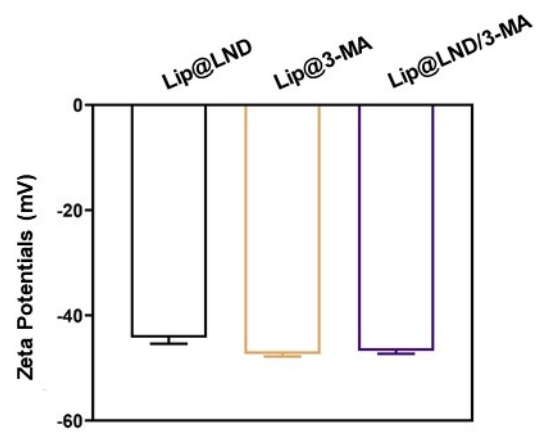

**Figure S1.** The zeta potentials of Lip@LND, Lip@3-MA and Lip@LND/3-MA (n=3).

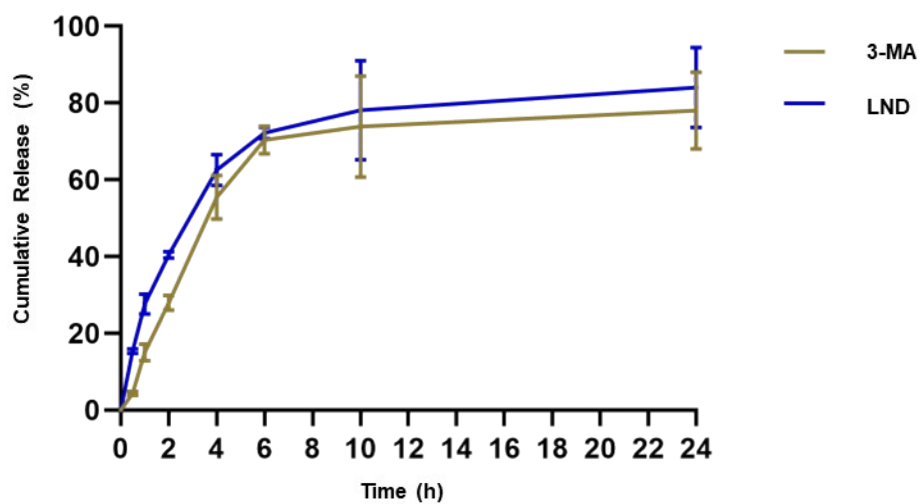

**Figure S2.** The cumulative release of Lip@LND/3-MA *in vitro* (n=3).

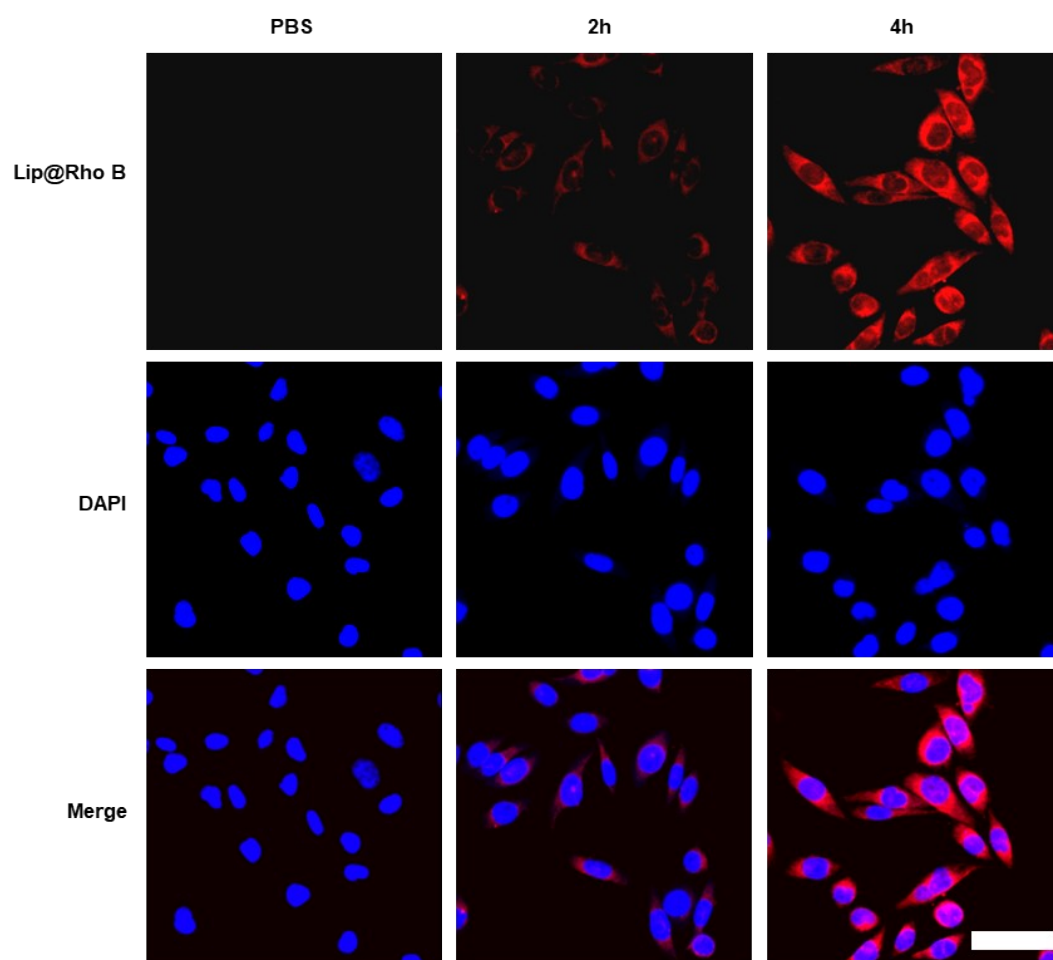

**Figure S3.** The cellular uptake of Lip@Rho B by LM3 cells *in vitro*. Scale bar: 20  $\mu\text{m}$ .

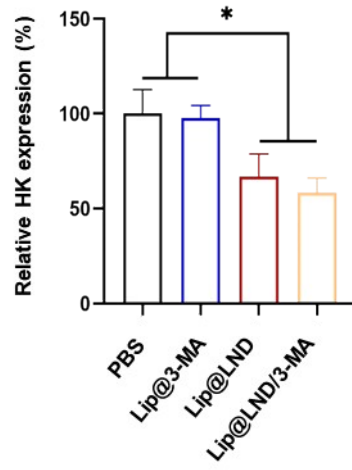

**Figure S4.** The relative hexokinase expression measured by western blot.

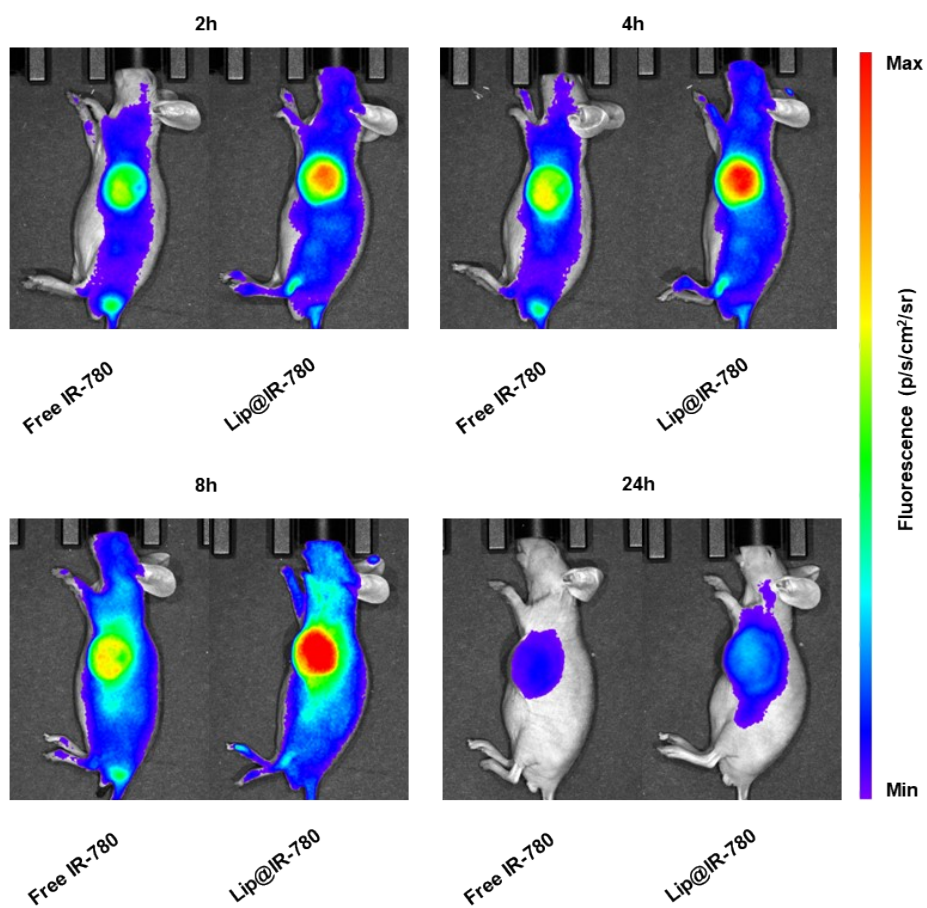

**Figure S5.** The body imaging of Lip@IR-780 in the LM3 tumor model at different time interval.

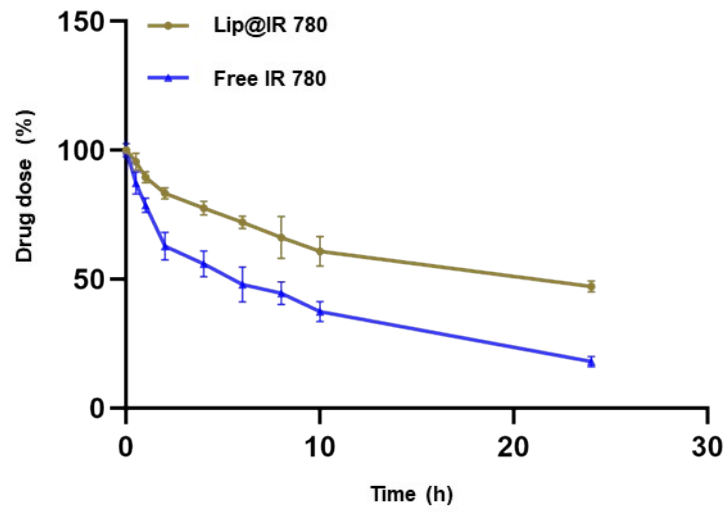

**Figure S6.** The pharmacokinetics of Lip@IR-780 in the LM3 tumor model *in vivo* (n=3).

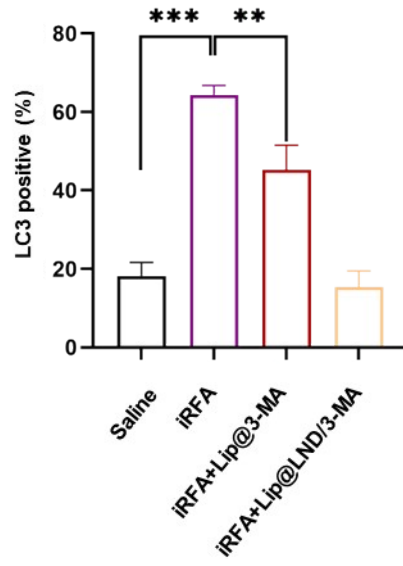

**Figure S7.** The LC3 positive rate after different treatments (n=3).



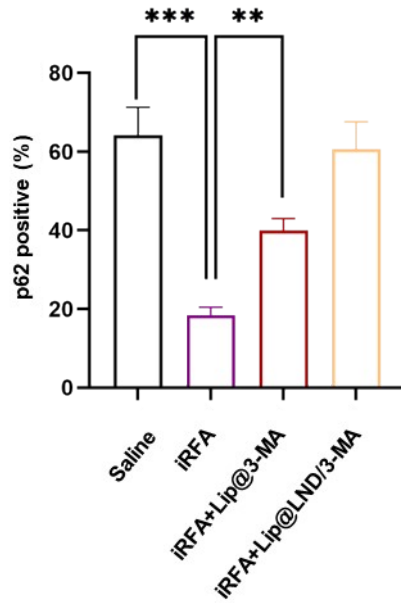

**Figure S8.** The p62 positive rate after different treatments (n=3).

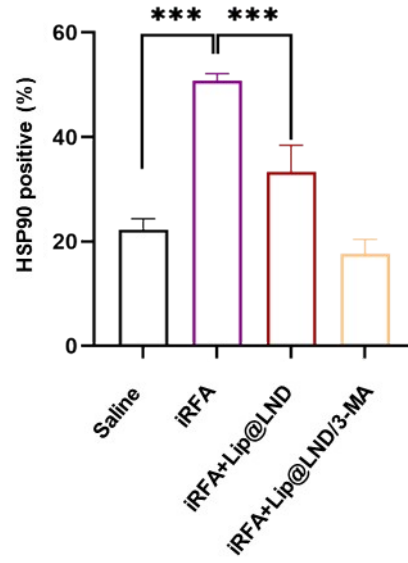

**Figure S9.** The HSP90 positive rate after different treatments (n=3).

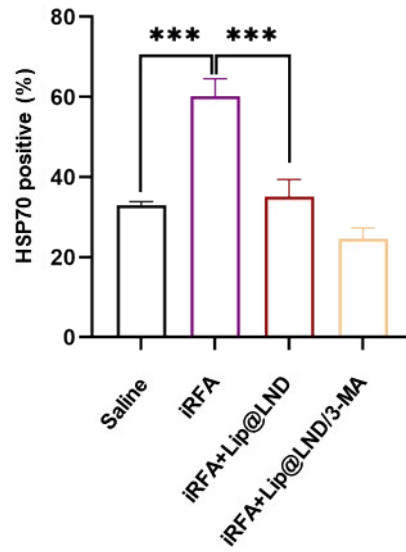

**Figure S10.** The HSP70 positive rate after different treatments (n=3).

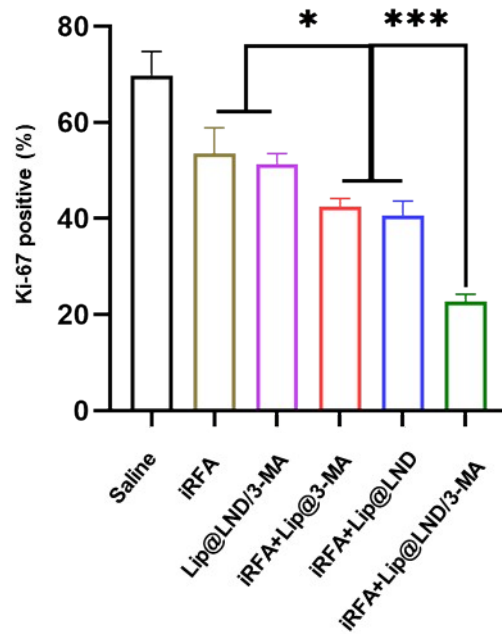

**Figure S11.** The Ki-67 positive rate after different treatments (n=3).

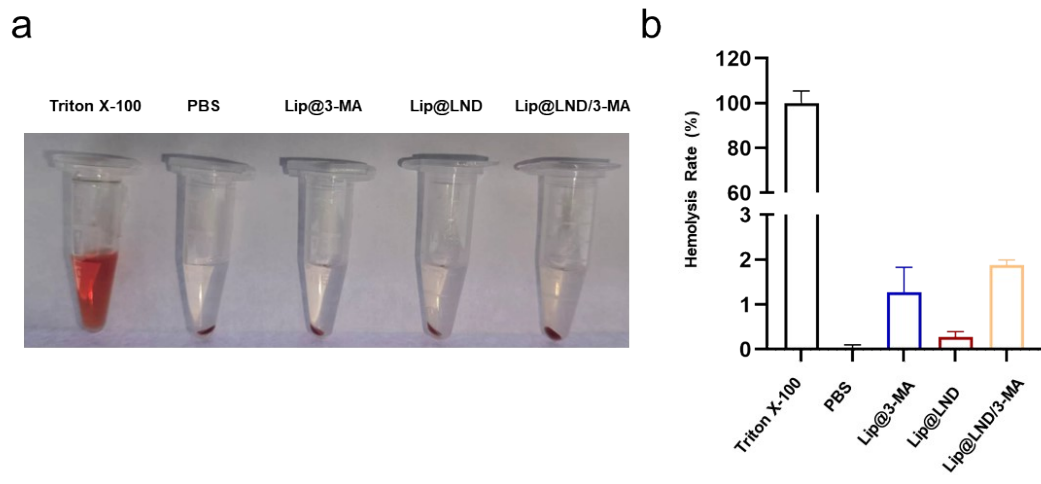

**Figure S12.** The photograph of hemolysis (a) and the hemolysis rate (b) after different treatments (n=3).

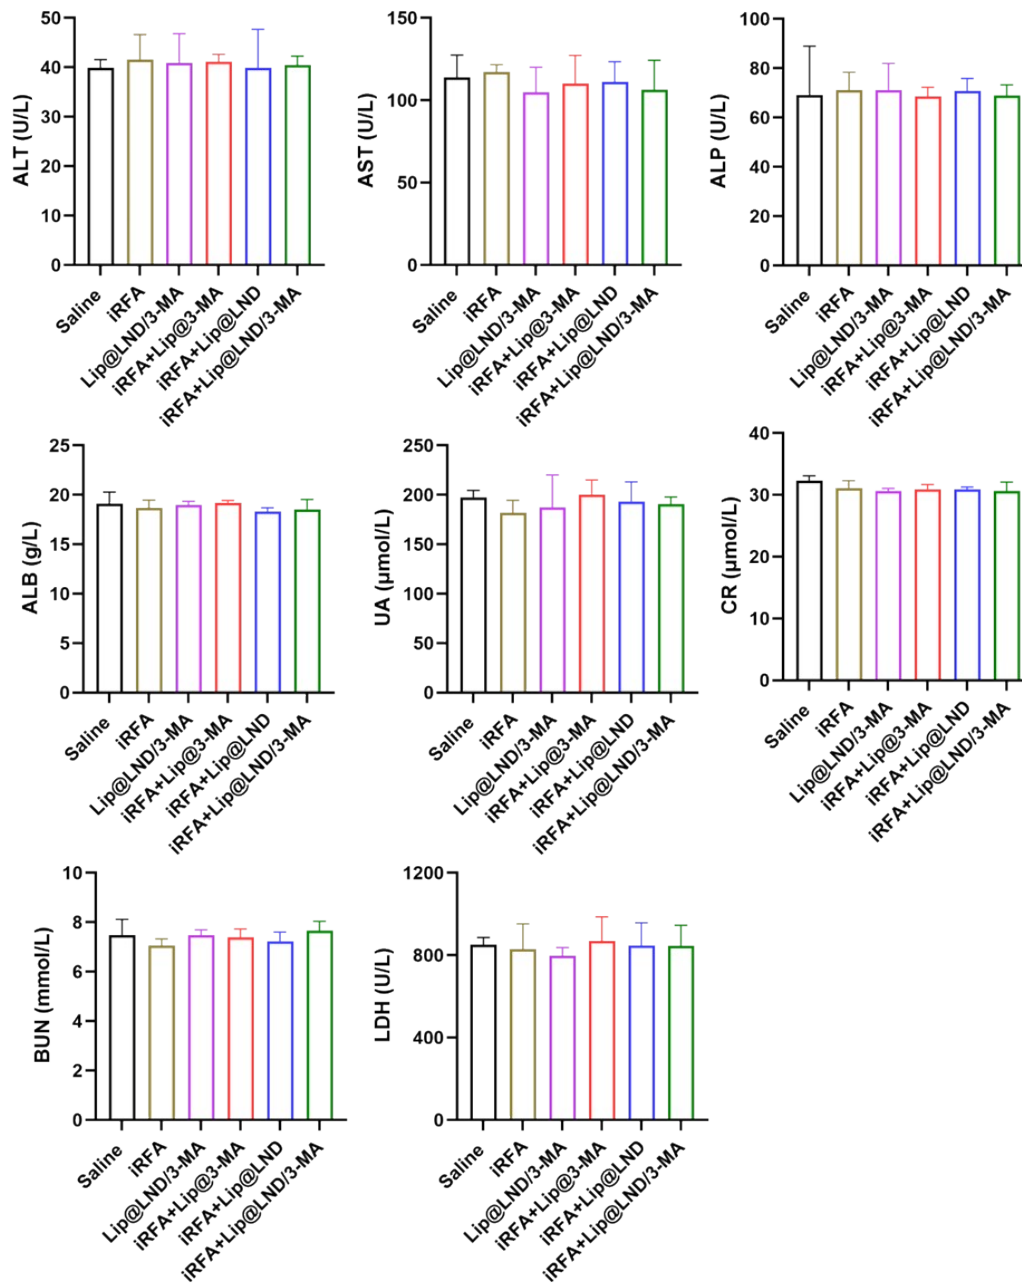

**Figure S13.** The blood biochemistry results in LM3 tumor model after different treatments (n=3).

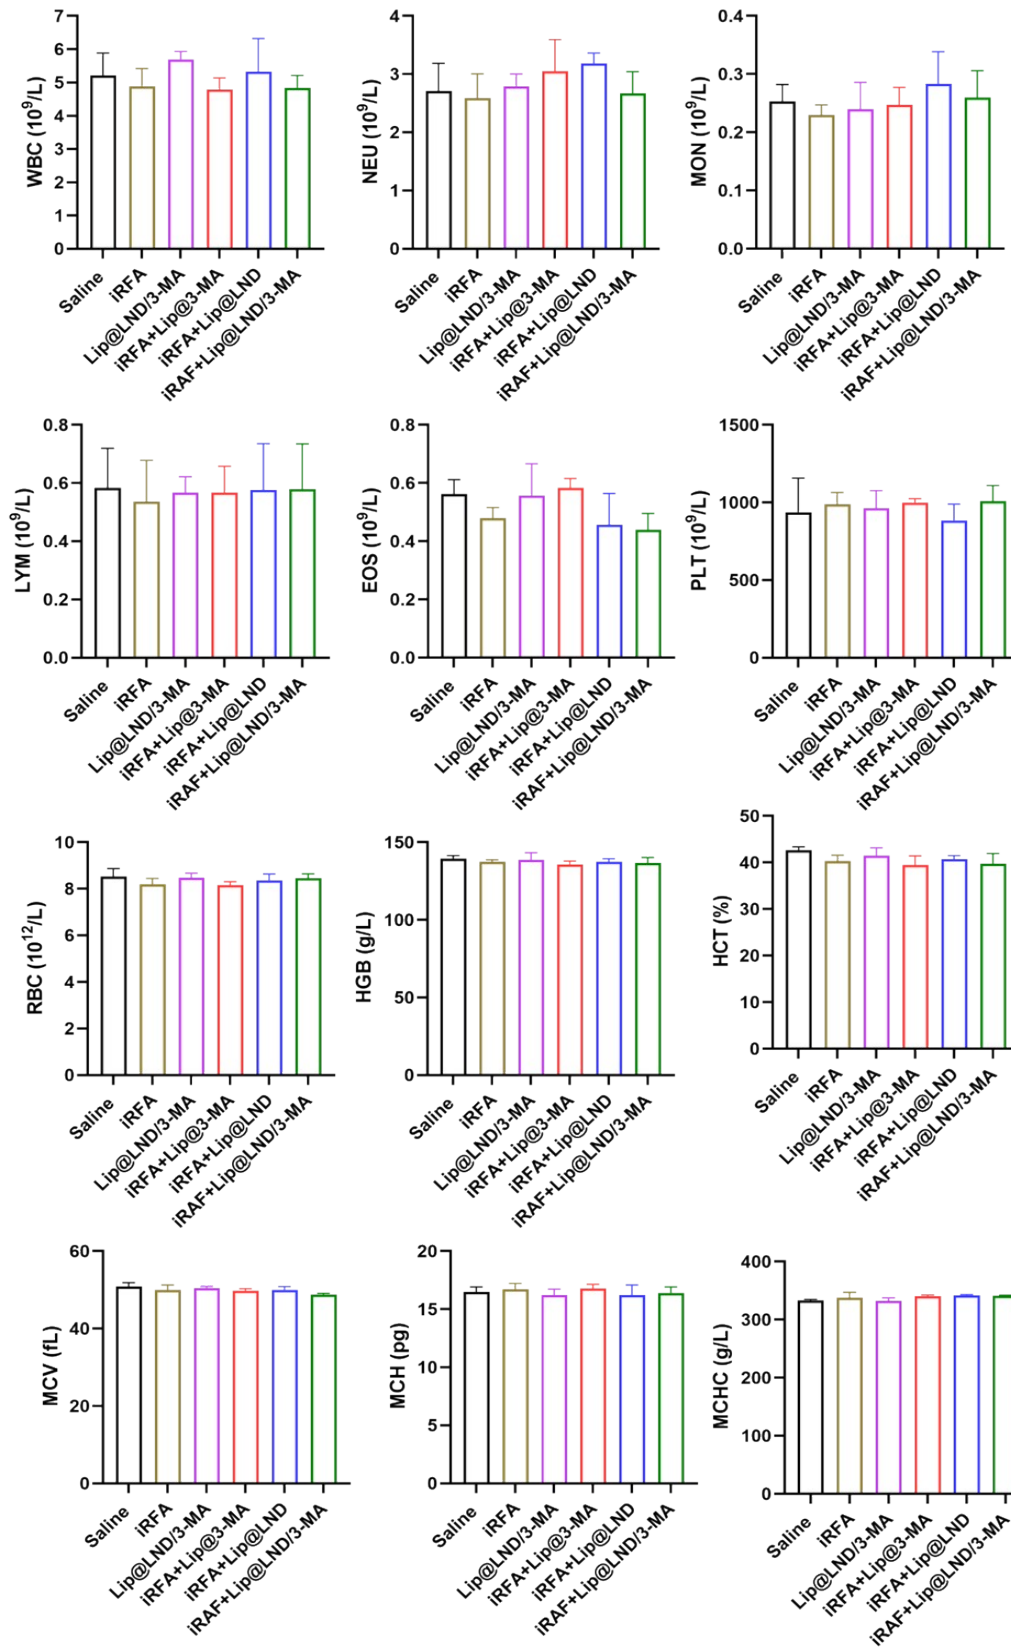

**Figure S14.** The blood routine results in LM3 tumor model after different treatments

(n=3).

**Table S1.** The encapsulation rate (ER) and drug loading content (DLC).

| Sample       | ER (%) |       | DLC (%) |      |
|--------------|--------|-------|---------|------|
|              | 3-MA   | LND   | 3-MA    | LND  |
| /            | 3-MA   | LND   | 3-MA    | LND  |
| Lip@3-MA     | 88.84  | /     | 2.56    | /    |
| Lip@LND      | /      | 86.82 | /       | 3.29 |
| Lip@LND/3-MA | 86.92  | 85.00 | 1.28    | 2.9  |



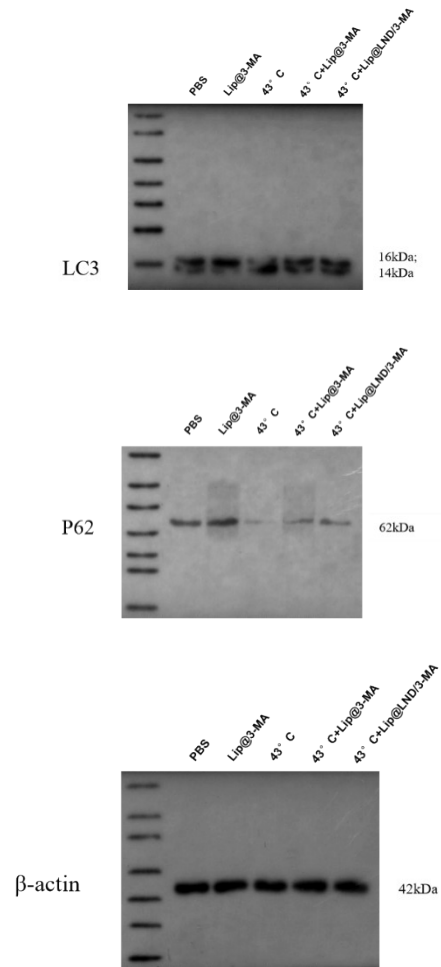

**Figure S15.** The image of the full gel and blot for Fig 2a.

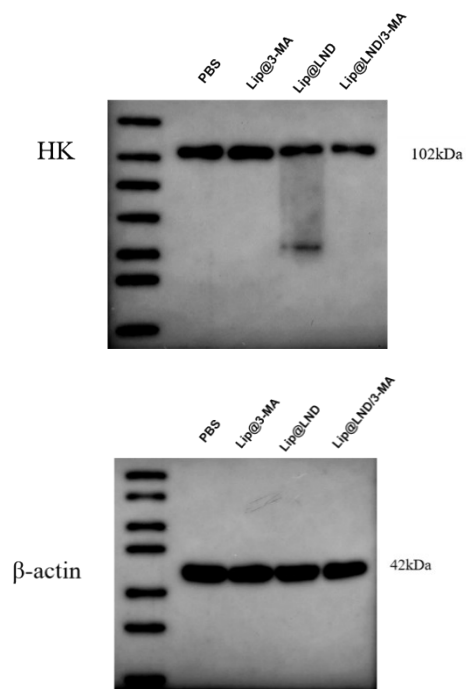

**Figure S16.** The image of the full gel and blot for Fig 3a.

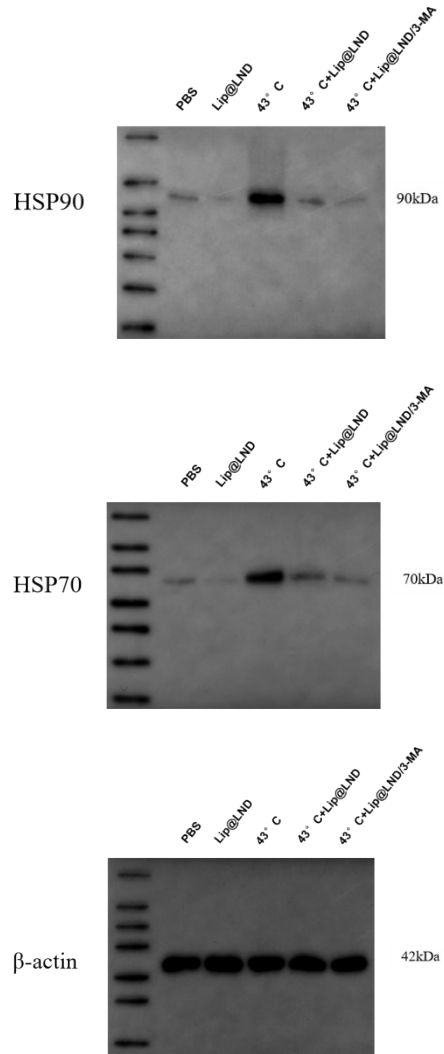

**Figure S17.** The image of the full gel and blot for Fig 3d.

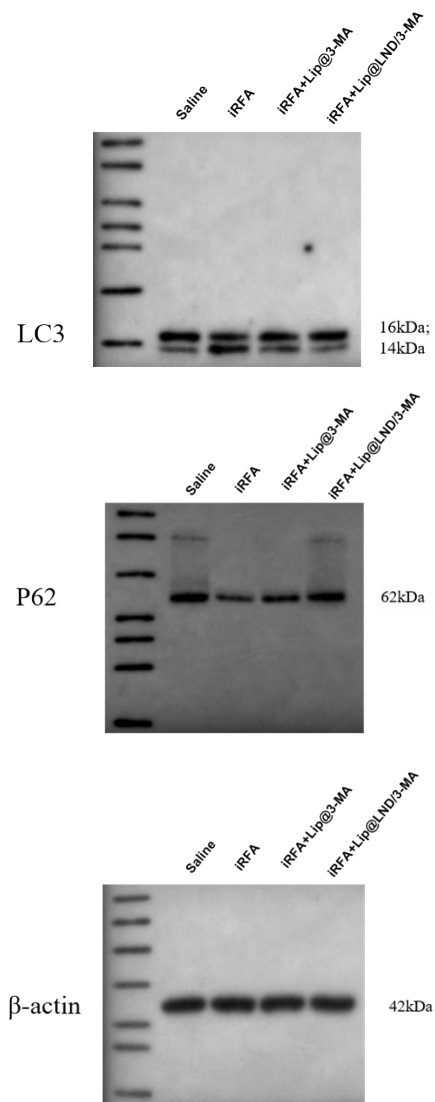

**Figure S18.** The image of the full gel and blot for Fig 5a.

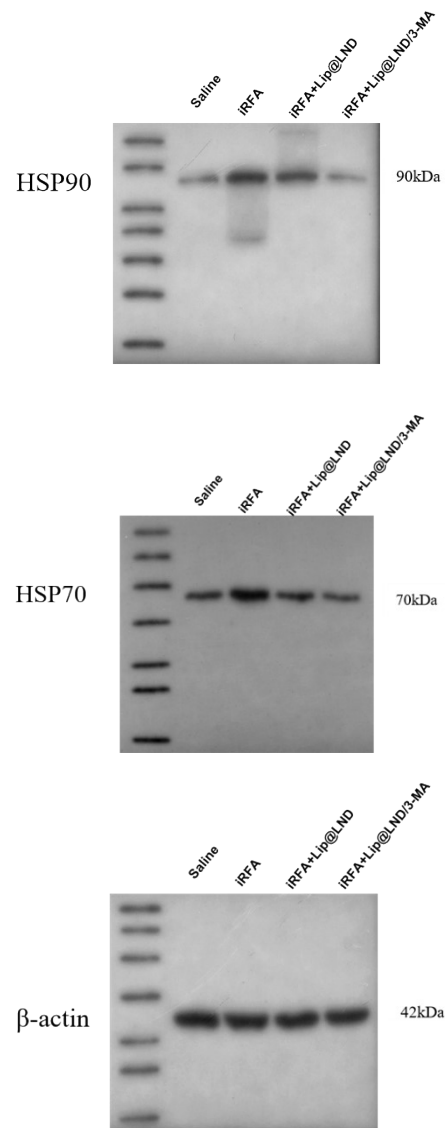

**Figure S19.** The image of the full gel and blot for Fig 6a.
